# Supplementary material for: Structural Insights into the Chaperone-Assisted Assembly of a Simplified Tail Fiber of the Myocyanophage Pam3
Source: MDPI journal article supplement (doi:10.3390/v14102260), 2022-10-14
Supplement: s1 [file s1]

## Supplementary figures and figure legends

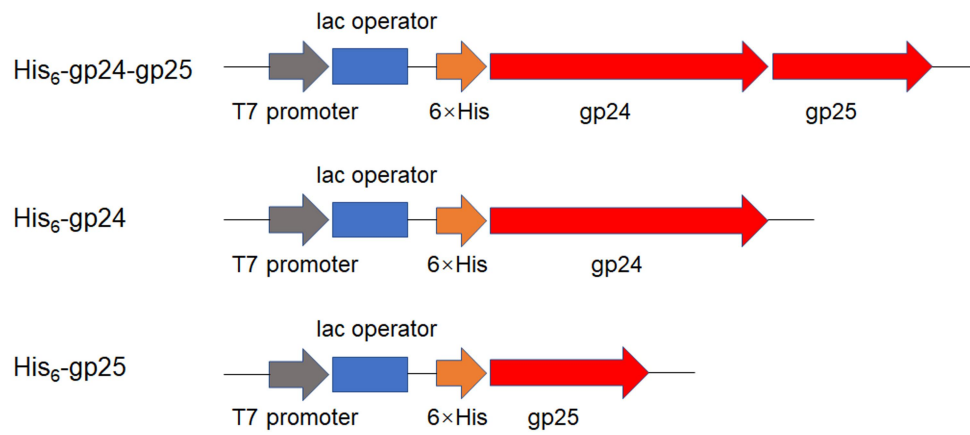

**Figure S1.** The vectors' architecture of *His<sub>6</sub>-gp24-gp25*, *His<sub>6</sub>-gp24* and *His<sub>6</sub>-gp25*.

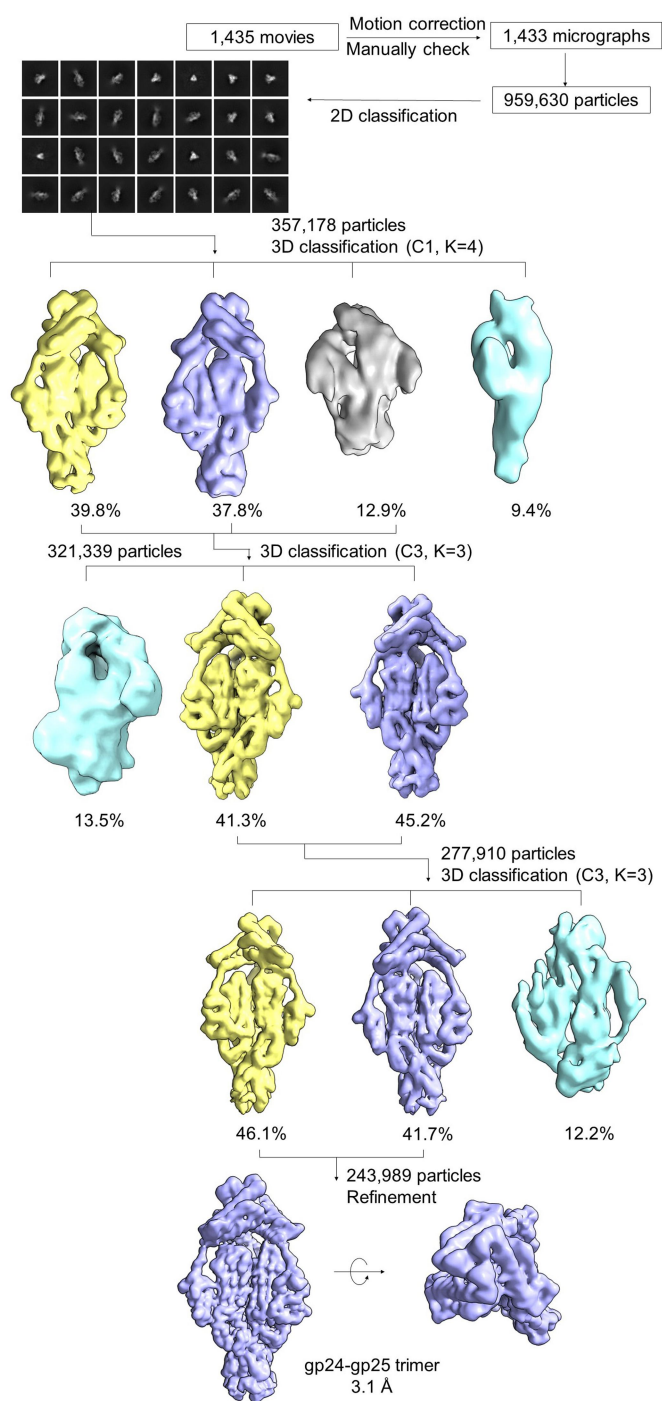

**Figure S2. A flowchart of cryo-EM data processing of the gp24-gp25 complex.**

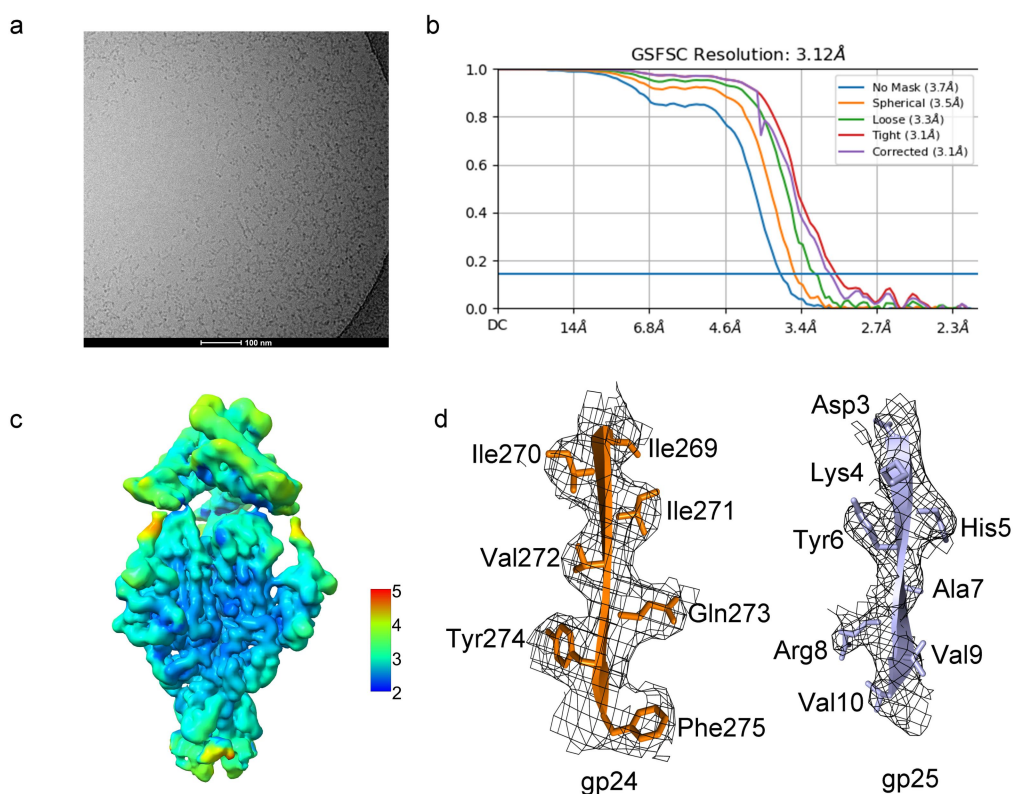

**Figure S3. The cryo-EM data analysis of gp24-gp25 complex.** (a) A representative raw micrograph of the gp24-gp25 complex. (b) The resolution curve of the cryo-EM maps estimated using the gold-standard Fourier shell correlation at 0.143 criterion. (c) The local resolution map of the gp24-gp25 complex estimated by cryoSPARC 3.1. (d) The models and the corresponding maps for the representative segments of gp24 and gp25.

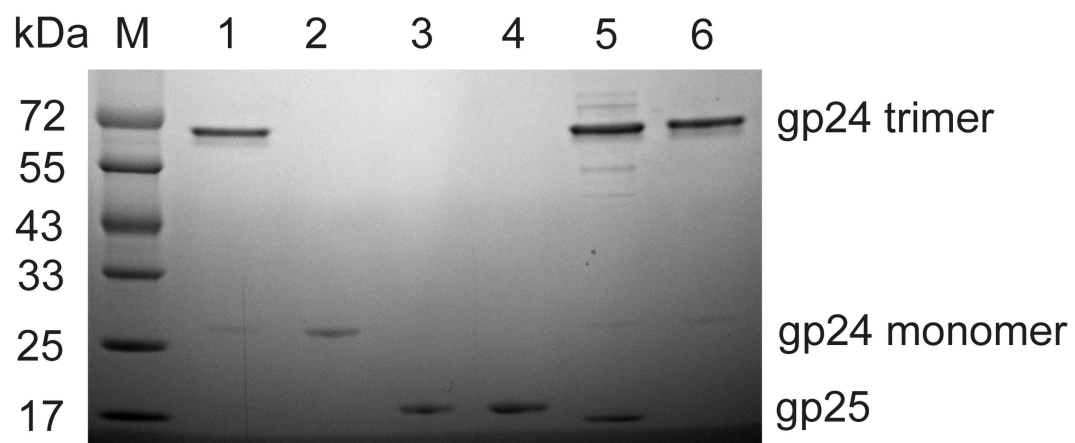

**Figure S4.** The SDS-PAGE analysis of the purified gp24, gp25 and gp24-gp25 complex. The protein samples were treated with  $\beta$ -Mercaptoethanol without boiling. The lane M represents the standard protein marker, whereas the samples 1~6 are the same as in Figure 1b.

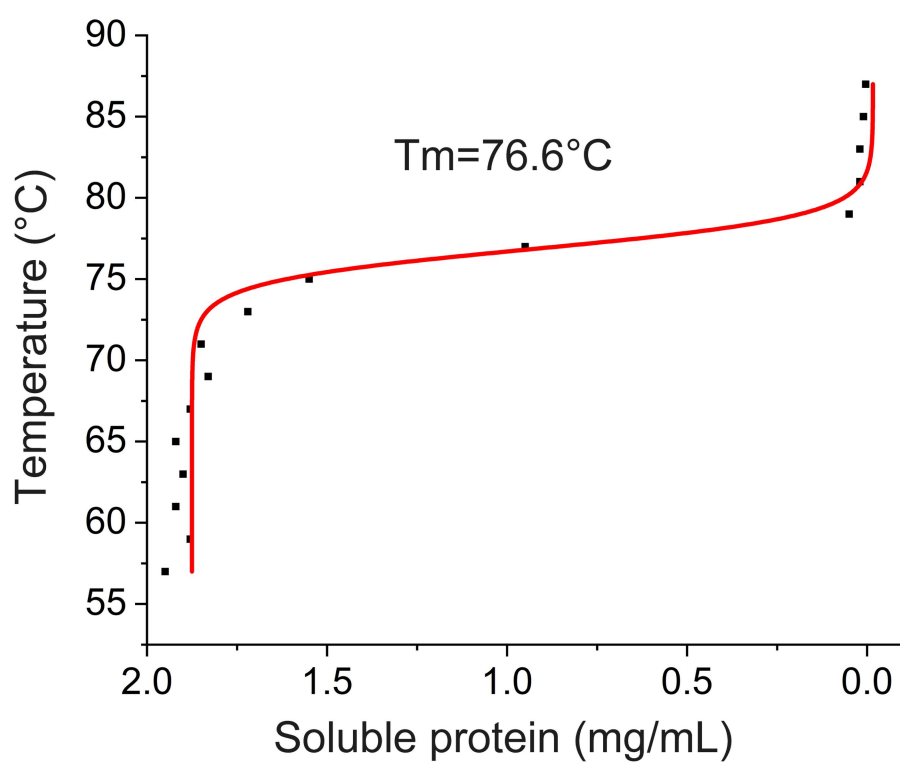

**Figure S5. The protein denaturation curve of the gp24 trimer.** The calculated T<sub>m</sub> value of 76.6°C is labeled.

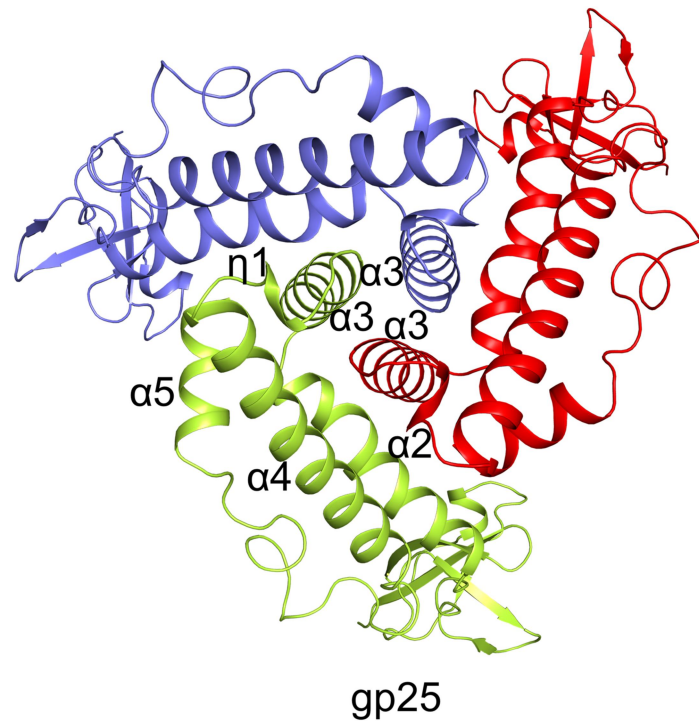

**Figure S6. Cartoon representation of gp25 trimer, shown in top view. Three subunits are colored in blue, red and green, respectively.**

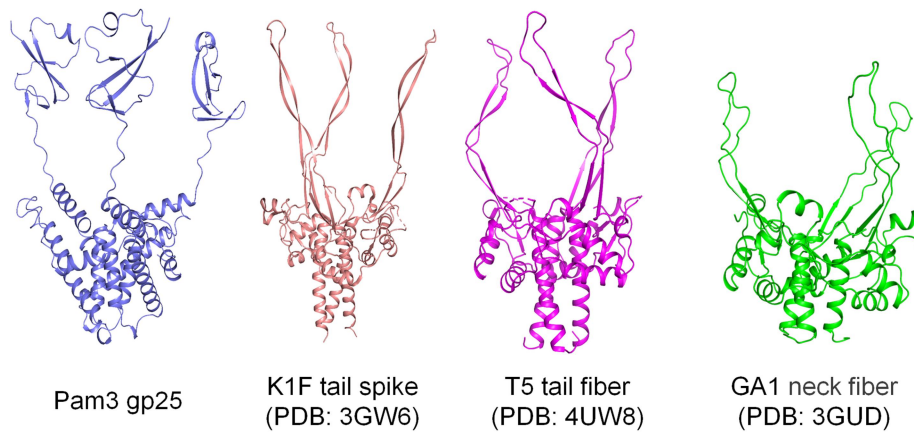

**Figure S7. Structures of gp25 and the intermolecular chaperone domains from different phages.** The structures are shown in cartoon and colored differently.

**Table S1. The mass spectrometry analysis of the intact Pam3 virions.**

| <b>Gene<br/>product</b> | <b>Mw<br/>(kDa)</b> | <b>Length<br/>(AA)</b> | <b>Coverage</b> | <b>PSMs</b> | <b>Unique<br/>Peptides</b> | <b>Predicted protein</b>   |
|-------------------------|---------------------|------------------------|-----------------|-------------|----------------------------|----------------------------|
| <b>gp6</b>              | 17.2                | 166                    | 98              | 1017        | 18                         | Cement                     |
| <b>gp7</b>              | 34.1                | 310                    | 67              | 949         | 33                         | Major capsid               |
| <b>gp3</b>              | 69.7                | 621                    | 72              | 505         | 37                         | Portal                     |
| <b>gp16</b>             | 62.3                | 588                    | 66              | 325         | 31                         | Tape measure protein       |
| <b>gp14</b>             | 15.3                | 142                    | 80              | 144         | 8                          | Tube                       |
| <b>gp13</b>             | 41.8                | 384                    | 65              | 138         | 25                         | Sheath                     |
| <b>gp18</b>             | 11.7                | 106                    | 69              | 116         | 7                          | Plug                       |
| <b>gp22</b>             | 32.6                | 299                    | 63              | 99          | 10                         | Baseplate wedge            |
| <b>gp23</b>             | 26.2                | 238                    | 50              | 85          | 9                          | Baseplate wedge            |
| <b>gp4</b>              | 29.8                | 268                    | 55              | 83          | 12                         | Phage minor capsid protein |
| <b>gp21</b>             | 13.9                | 125                    | 70              | 77          | 7                          | Sheath initiator           |
| <b>gp20</b>             | 23.5                | 221                    | 72              | 70          | 12                         | Spike                      |
| <b>gp9</b>              | 13.9                | 131                    | 50              | 68          | 6                          | Adaptor                    |
| <b>gp24</b>             | 27.3                | 280                    | 33              | 66          | 5                          | Tail fiber                 |
| <b>gp10</b>             | 16.6                | 152                    | 45              | 55          | 6                          | Hypothetical protein       |
| <b>gp17</b>             | 19.8                | 191                    | 57              | 51          | 11                         | Tube initiator             |
| <b>gp12</b>             | 17.7                | 156                    | 62              | 49          | 11                         | Terminator                 |
| <b>gp5</b>              | 377                 | 40.7                   | 32              | 44          | 10                         | Prohead protease           |
| <b>gp11</b>             | 12                  | 110                    | 60              | 41          | 6                          | Connector                  |
| <b>gp19</b>             | 25.1                | 229                    | 62              | 34          | 9                          | Hub                        |
| <b>gp27</b>             | 25.6                | 233                    | 11              | 2           | 2                          | Hypothetical protein       |
| <b>gp57</b>             | 14.8                | 138                    | 11              | 1           | 1                          | Deoxycytidylate deaminase  |
